# Supplementary material
Source: PubMed Central journal article supplement (PMC2904004)
Supplement: supp_51_7_3379__1.pdf [file supp_51_7_3379__1.pdf]

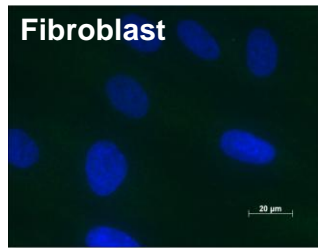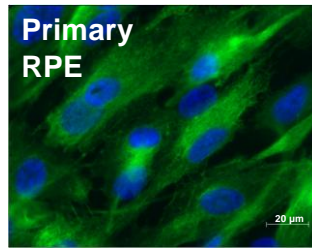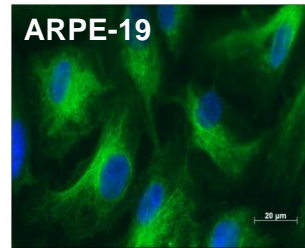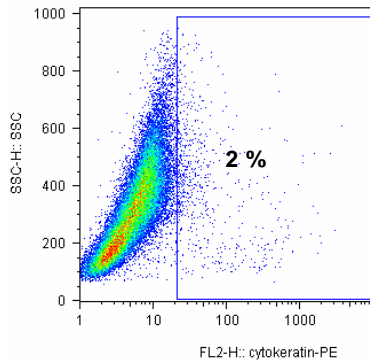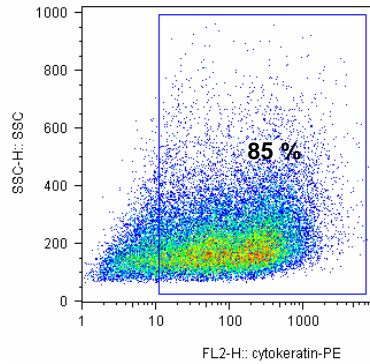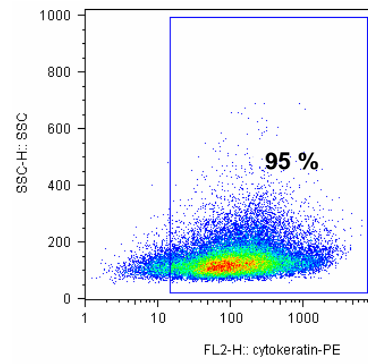

### Supplementary Figure S1. Characterization of cultured primary RPE cells.

Upper panel: Cytokeratin 18 immunostaining of human primary RPE culture compared to positive control retinal epithelial cell line (ARPE-19) and negative control human primary fibroblast culture.  
Lower panel: FACS generated scatter plot showing cell size versus cytokeratin-18 staining intensity in human fibroblast cell line (left), in a human primary RPE culture prepared from an autopsy eye (middle) and in an established ARPE-19 cell line.
