# Supplementary material
Source: PubMed Central journal article supplement (PMC2904004)
Supplement: supp_51_7_3379__2.pdf [file supp_51_7_3379__2.pdf]

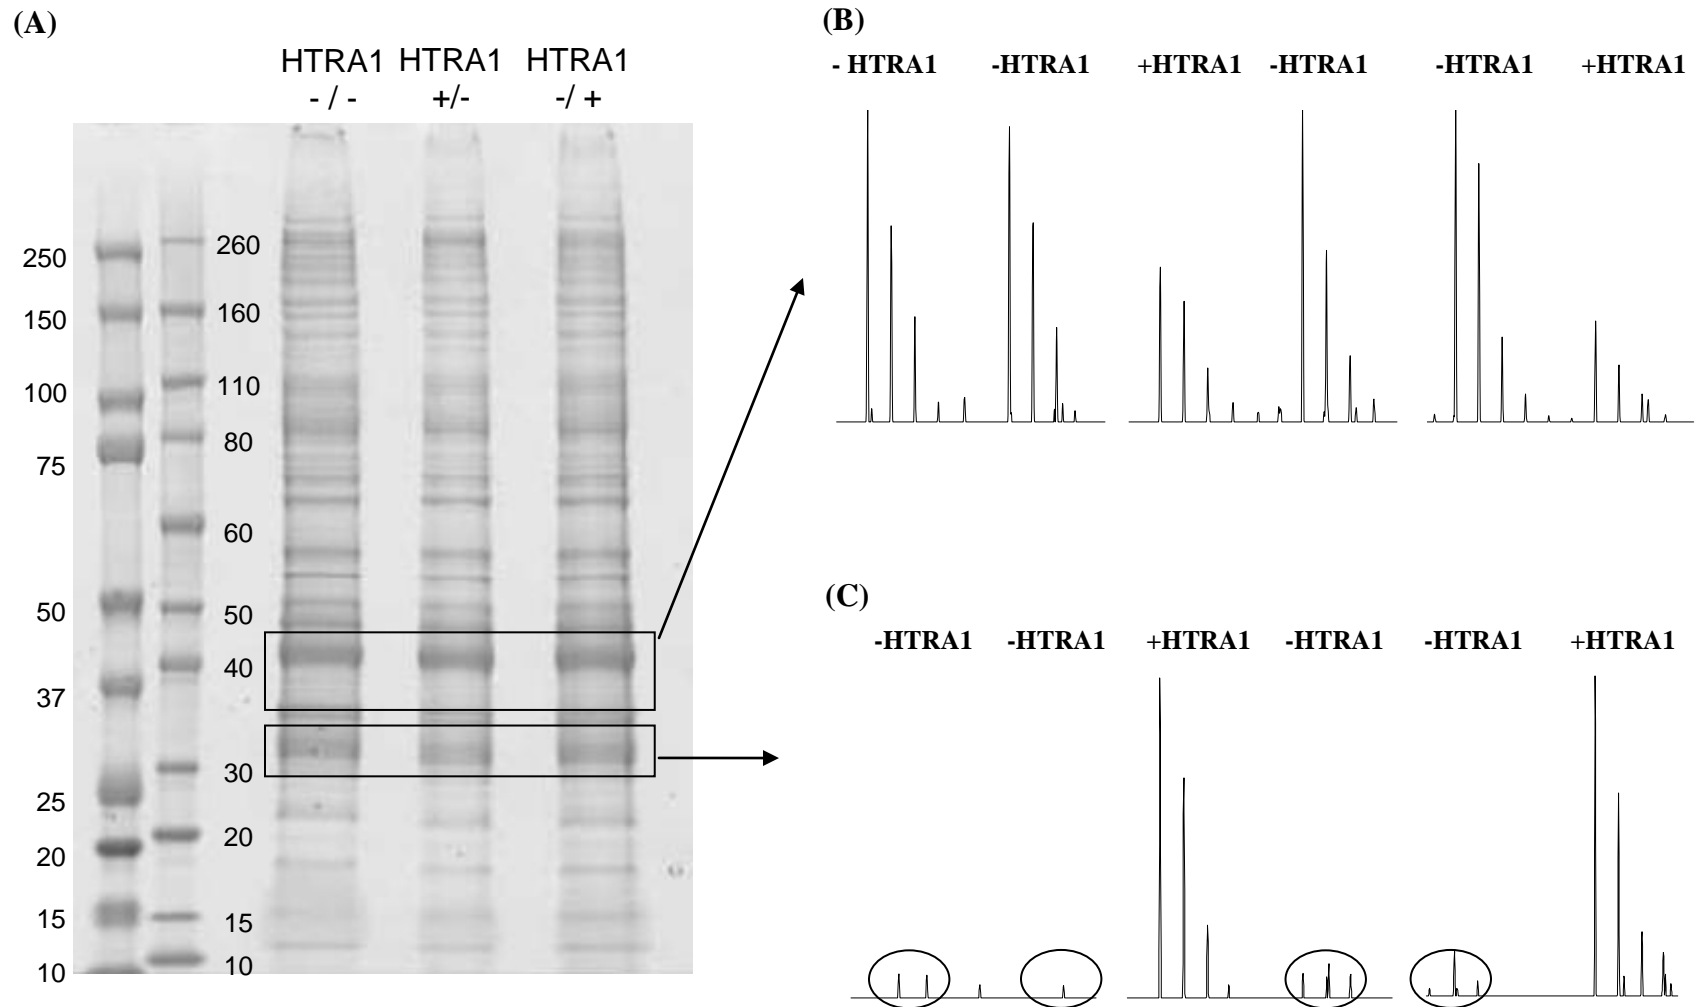

**Supplementary Figure S2. Detection of clusterin degradation products in HTRA1 treated RPE conditioned medium**

(A) Show SDS-PAGE of SILAC labeled and unlabeled RPE secreted protein mixture pairs in both HTRA1 untreated (-HTRA1) and treated samples (+HTRA1). Clusterin was identified by unique peptides around 45K and 35K in the SDS-PAGE, (B) Shows mass spectra of labeled and unlabeled peptide pair detected for clusterin in the 45 kDa upper band. Ratio of these peptide pairs were 1:1 when both labeled and unlabeled samples were kept untreated but dropped to about 0.5 in HTRA1 treated samples versus non treated samples. (C) Shows mass spectra of another labeled and unlabeled clusterin peptide detected in lower band (~ 35 KDa) however this time the peptide was intense only in HTRA1 treated samples suggesting a degradation product of clusterin by recombinant HTRA1. Small amounts of this same peptide marked with circle was still detected in untreated sample (-HTRA1) and those could be a result of activity of RPE secreted HTRA1.
