# Supplementary material
Source: PubMed Central journal article supplement (PMC2904004)
Supplement: supp_51_7_3379__4.pdf [file supp_51_7_3379__4.pdf]

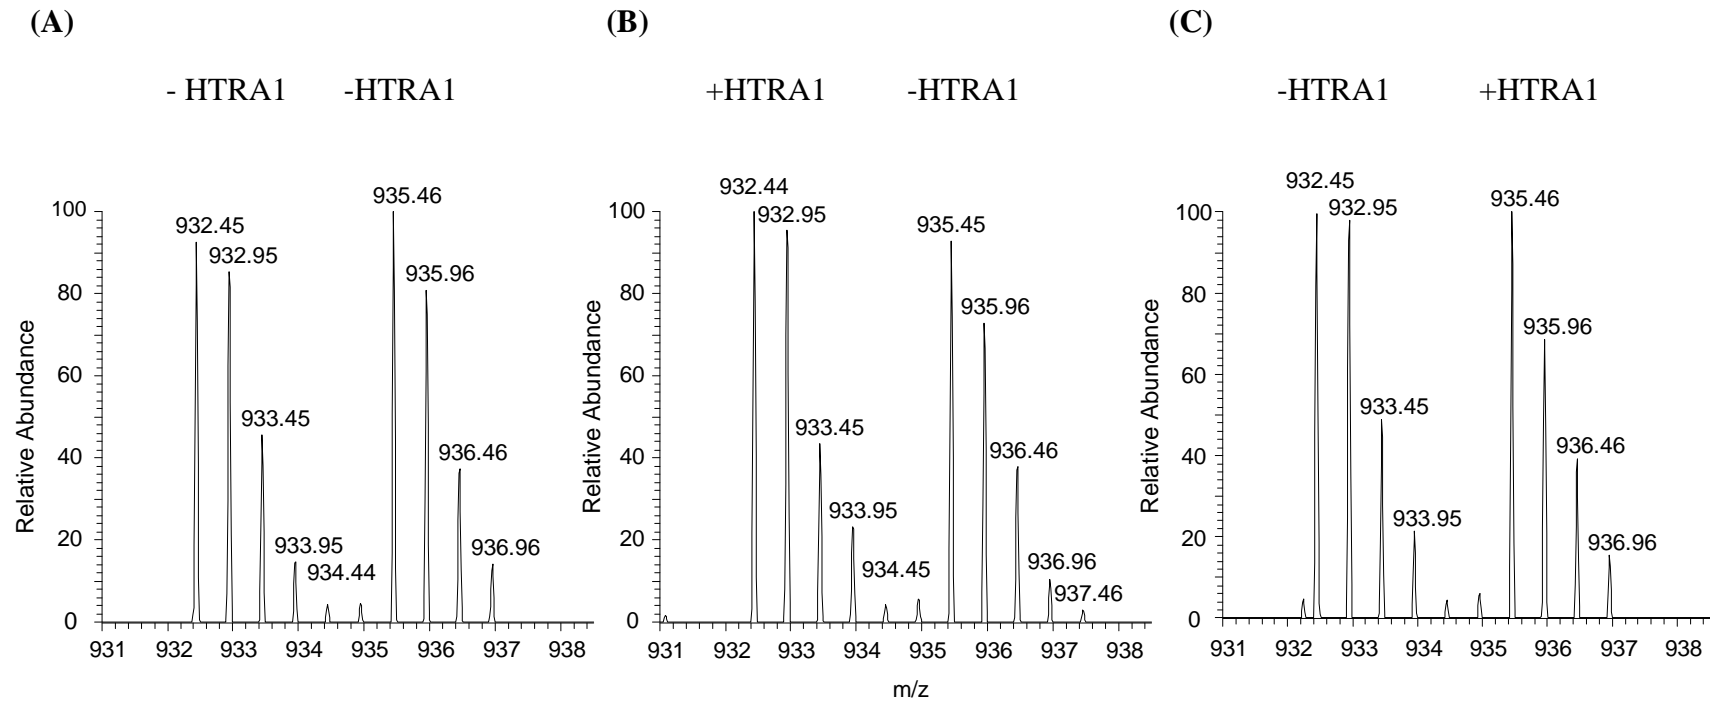

**Supplementary Figure S4. HTRA1 at lower dose did not cleave Fibronectin.**

Spectra show pairs of SILAC labeled and unlabeled peptides detected for fibronectin protein in HTRA1 treated (+HTRA1) versus untreated (-HTRA1) RPE conditioned medium. (A) Mass spectra when both SILAC labeled and unlabeled samples were untreated. (B) Mass spectra when unlabeled sample was treated while SILAC labeled sample was kept untreated. (C) Mass spectra of a reverse experiment when unlabeled sample was untreated while labeled sample was treated. Both 4 hours and 20 hours incubation with HTRA1 did not affect the ratios of fibronectin in HTRA treated sample versus untreated sample.
