# Supplementary material
Source: PubMed Central journal article supplement (PMC2904004)
Supplement: supp_51_7_3379__5.pdf [file supp_51_7_3379__5.pdf]

**Supplementary Table S1. Donor information:** age, gender, AMD history, genotyping of SNPs for *CFH*, *HTRA1/ARMS2*, smoking history, cause of death and time of enucleation<sup>a</sup>

| Donor | Age | Gender | AMD    | SNP |             | Smoking                       | Cause of Death                        | Enucleation |
|-------|-----|--------|--------|-----|-------------|-------------------------------|---------------------------------------|-------------|
|       |     |        |        | CFH | HTRA1/ARMS2 |                               |                                       |             |
| 1     | 76  | M      | Normal | TT  | AA/TT       | N/D                           | Parkinson's Disease                   | 6           |
| 3     | 57  | F      | Normal | TC  | AA/TT       | 1ppd for 45 years             | Lung cancer with Mets                 | 10          |
| 4     | 78  | F      | Normal | TT  | GG/GG       | No                            | unknown                               | 10          |
| 5     | 81  | F      | Normal | TT  | GA/GT       | N/D                           | Subarachnoidal bleed                  | 4           |
| 6     | 72  | M      | Normal | TC  | GA/GT       | quit in 1993                  | Chronic obstructive pulmonary disease | 12          |
| 7     | 61  | F      | Normal | CC  | GG/GG       | 1 ppd for 40 years            | Probable Myocardial infarction        | 10          |
| 8     | 48  | F      | Normal | TT  | GG/GG       | No                            | Congestive Heart Failure              | 14          |
| 9     | 68  | F      | AMD    | TT  | GG/GG       | 2 ppd for 40 years            | Stroke                                | 3           |
| 10    | 80  | M      | Normal | CC  | GA/GT       | quit in 1984                  | Acute Myocardial infarction           | 9.4         |
| 11    | 66  | F      | Normal | TC  | GA/CT       | quit in 1998                  | Amyotrophic lateral sclerosis         | 9.5         |
| 12    | 74  | M      | Normal | TT  | GG/GG       | quit in 1980                  | Myocardial infarction                 | 7.5         |
| 13    | 65  | F      | Normal | TC  | GA/GT       | 1 ppd duration unknown        | Respiratory Arrest                    | 6           |
| 14    | 82  | M      | AMD    | TC  | GA/GT       | 1 ppd for 40 years            | Cardial related                       | 12          |
| 15    | 11  | M      | Normal | TT  | GAGT        | No                            | Multiple Trauma                       | 8.5         |
| 16    | 69  | M      | Normal | TC  | GG/GG       | 1 ppd, quit 1982              | Acute Myocardial infarction           | 13          |
| 17    | 81  | M      | AMD    | CC  | AA/TT       | N/D                           | Cardial arrest                        | 10.5        |
| 18    | 59  | F      | Normal | TT  | GG/GG       | No                            | Respiratory Failure                   | 1           |
| 19    | 80  | F      | AMD    | TC  | GG/GG       | No                            | GI bleed                              | 9           |
| 20    | 68  | F      | Normal | TT  | GG/GG       | No                            | Chronic obstructive pulmonary disease | 8           |
| 23    | 17  | M      | Normal | TC  | GG/GG       | N/D                           | Motor vehicle accident                | 9           |
| 24    | 75  | F      | Normal | TC  | GAGT        | N/D                           | Respiratory Arrest                    | 4           |
| 25    | 50  | M      | Normal | TT  | GG/GG       | No                            | Myocardial infarction                 | 17          |
| 26    | 62  | F      | Normal | TC  | GA/GT       | No                            | Cardiac arrest                        | 30          |
| 27    | 70  | M      | Normal | TT  | GAGT        | 2 ppd for 35 years, quit 1993 | Probable Myocardial infarction        | 8           |
| 29    | 62  | F      | Normal | TC  | GA/GT       | No                            | Myocardial infarction                 | 9           |
| 30    | 59  | M      | Normal | TT  | GG/GG       | 2 ppd for 40 years, quit 2006 | Respiratory Failure                   | 6           |
| 31    | 49  | M      | Normal | TC  | GG/GG       | a few packs per week          | Probable Myocardial infarction        | 9.5         |
| 32    | 75  | F      | AMD    | TC  | AA/TT       | No                            | Pancreatic Cancer                     | 7           |
| 33    | 77  | F      | AMD    | CC  | GA/GT       | No                            | throat cancer                         | 5           |
| 34    | 81  | M      | AMD    | TC  | GA/GT       | Quit in 1970                  | Cardiogenic shock                     | 3           |

<sup>a</sup>A total of 34 autopsy eyes were collected. 30 RPE cell cultures were established.

<sup>b</sup>(M = male, F = female, N/D = not determined, ppd = pack per day)
