# Supplementary material
Source: PubMed Central journal article supplement (PMC2904004)
Supplement: supp_51_7_3379__6.pdf [file supp_51_7_3379__6.pdf]

**Supplementary Table S2. List of extracellular proteins identified and quantified in HTRA1 treated and untreated RPE conditioned media.**

| SwissProt ID | Protein names                                                         | Peptide # | Control     | HTRA1 Treatment |              | Localization |
|--------------|-----------------------------------------------------------------------|-----------|-------------|-----------------|--------------|--------------|
|              |                                                                       |           | (-)/(-)     | 4hr (+)/(-)     | 20hr (+)/(-) |              |
| Q8NCC3       | 1-O-acylceramide synthase                                             | 3         | 0.83 ± 0.00 | 1.17 ± 0.16     | 1.02 ± 0.36  | Secreted     |
| P08253       | 72 kDa type IV collagenase                                            | 13        | 0.89 ± 0.05 | 1.03 ± 0.12     | 1.05 ± 0.06  | Secreted     |
| Q8IUX7       | Adipocyte enhancer-binding protein 1                                  | 13        | 0.81 ± 0.00 | 1.29 ± 0.19     | 1.03 ± 0.05  | Secreted     |
| O00468       | Agtrin                                                                | 14        | 0.83 ± 0.09 | 1.07 ± 0.18     | 1.02 ± 0.19  | Secreted     |
| P01011       | Alpha-1-antichymotrypsin                                              | 14        | 1.11 ± 0.08 | 1.13 ± 0.21     | 0.98 ± 0.02  | Secreted     |
| P01023       | Alpha-2-macroglobulin - around 160K                                   | 5         | 0.90 ± 0.02 | 0.16 ± 0.00     | 0.45 ± 0.00  | Secreted     |
| P01023 *     | Alpha-2-macroglobulin - around 60K                                    | 6         | ND          | 4.42 ± 0.00     | ND           | Secreted     |
| P06733       | Alpha-enolase                                                         | 25        | 1.14 ± 0.10 | 1.01 ± 0.05     | 0.70 ± 0.05  | Membrane     |
| Q9H4A4       | Aminopeptidase B                                                      | 8         | 1.09 ± 0.32 | 0.97 ± 0.11     | 0.82 ± 0.00  | Secreted     |
| P05067       | Amyloid beta A4 protein                                               | 19        | 0.82 ± 0.10 | 1.07 ± 0.14     | 1.03 ± 0.22  | Membrane     |
| P07355       | Annexin A2                                                            | 17        | 0.77 ± 0.00 | 1.12 ± 0.18     | 1.12 ± 0.33  | Secreted     |
| Q8NCW5       | Apolipoprotein A-I-binding protein                                    | 3         | 1.23 ± 0.48 | 1.05 ± 0.14     | 1.11 ± 0.03  | Secreted     |
| O75882       | Attractin                                                             | 11        | 0.90 ± 0.15 | 1.05 ± 0.03     | 0.92 ± 0.07  | Secreted     |
| P98160       | Basement membrane-specific heparan sulfate proteoglycan core protein  | 27        | 1.07 ± 0.09 | 1.06 ± 0.07     | 1.04 ± 0.05  | Secreted     |
| P61769       | Beta-2-microglobulin [Cleaved into: Beta-2-microglobulin form pI 5.3] | 10        | 0.98 ± 0.14 | 1.06 ± 0.04     | 1.07 ± 0.05  | Secreted     |
| P21810       | Biglycan                                                              | 13        | 0.99 ± 0.10 | 0.98 ± 0.05     | 0.93 ± 0.05  | Secreted     |
| P43251       | Biotinidase                                                           | 3         | 0.99 ± 0.08 | 1.10 ± 0.07     | 0.90 ± 0.22  | Secreted     |
| P13497       | Bone morphogenetic protein 1                                          | 3         | 0.86 ± 0.18 | 1.16 ± 0.31     | ND           | Secreted     |
| P80723       | Brain acid soluble protein 1                                          | 9         | 1.17 ± 0.11 | 1.03 ± 0.24     | 1.14 ± 0.28  | Membrane     |
| P55287       | Cadherin-11                                                           | 12        | 1.10 ± 0.08 | 1.00 ± 0.01     | 1.04 ± 0.02  | Membrane     |
| P55290       | Cadherin-13                                                           | 5         | 1.05 ± 0.11 | 1.05 ± 0.16     | 1.05 ± 0.04  | Membrane     |
| P19022       | Cadherin-2                                                            | 12        | 0.92 ± 0.04 | 1.06 ± 0.18     | 1.06 ± 0.29  | Membrane     |
| P55285       | Cadherin-6                                                            | 7         | 0.92 ± 0.23 | 1.05 ± 0.00     | 0.93 ± 0.06  | Membrane     |
| P27797       | Calreticulin                                                          | 24        | 1.07 ± 0.05 | 1.08 ± 0.11     | 1.00 ± 0.04  | Secreted     |
| O94985       | Calsyntenin-1                                                         | 29        | 0.91 ± 0.03 | 1.04 ± 0.16     | 1.03 ± 0.11  | Membrane     |
| Q9H4D0       | Calsyntenin-2                                                         | 23        | 0.87 ± 0.07 | 1.04 ± 0.16     | 0.99 ± 0.09  | Membrane     |
| O43852       | Calumenin                                                             | 31        | 1.23 ± 0.10 | 1.08 ± 0.24     | 1.09 ± 0.32  | Secreted     |
| Q9UI42       | Carboxypeptidase A4                                                   | 22        | 1.04 ± 0.10 | 1.04 ± 0.03     | 1.02 ± 0.00  | Secreted     |
| P16870       | Carboxypeptidase E                                                    | 4         | 0.89 ± 0.11 | 0.97 ± 0.29     | 0.94 ± 0.01  | Secreted     |
| P49747       | Cartilage oligomeric matrix protein                                   | 5         | 0.97 ± 0.03 | 1.07 ± 0.03     | 1.01 ± 0.04  | Secreted     |
| P13500       | C-C motif chemokine 2                                                 | 5         | 1.13 ± 0.08 | 1.06 ± 0.15     | 1.16 ± 0.20  | Secreted     |

|        |                                                        |    |             |             |             |          |
|--------|--------------------------------------------------------|----|-------------|-------------|-------------|----------|
| P48509 | CD151 antigen                                          | 1  | 1.15 ± 0.00 | 1.33 ± 0.00 | 1.14 ± 0.00 | Membrane |
| Q13740 | CD166 antigen                                          | 4  | 1.07 ± 0.12 | 1.19 ± 0.27 | 1.04 ± 0.03 | Membrane |
| Q8NFZ8 | Cell adhesion molecule 4                               | 5  | 0.97 ± 0.04 | ND          | 1.02 ± 0.23 | Membrane |
| P00450 | Ceruloplasmin                                          | 11 | 1.17 ± 0.13 | 1.05 ± 0.20 | 0.98 ± 0.14 | Secreted |
| P36222 | Chitinase-3-like protein 1                             | 18 | 1.38 ± 0.09 | 1.08 ± 0.42 | 1.04 ± 0.34 | Secreted |
| O00299 | Chloride intracellular channel protein 1               | 3  | 1.03 ± 0.06 | 0.73 ± 0.00 | 0.51 ± 0.07 | Membrane |
| Q9Y696 | Chloride intracellular channel protein 4               | 5  | 0.98 ± 0.10 | 0.81 ± 0.04 | 0.83 ± 0.15 | Membrane |
| P10909 | Clusterin                                              | 15 | 1.00 ± 0.08 | 0.81 ± 0.00 | 0.48 ± 0.09 | Secreted |
| Q76M96 | Coiled-coil domain-containing protein 80               | 20 | 0.70 ± 0.09 | 1.07 ± 0.19 | 1.06 ± 0.04 | Secreted |
| P02452 | Collagen alpha-1                                       | 55 | 1.06 ± 0.11 | 1.11 ± 0.13 | 1.03 ± 0.08 | Secreted |
| P02458 | Collagen alpha-1                                       | 5  | 1.30 ± 0.29 | 1.28 ± 0.00 | 1.06 ± 0.31 | Secreted |
| P02461 | Collagen alpha-1                                       | 46 | 1.27 ± 0.13 | 1.10 ± 0.30 | 1.07 ± 0.30 | Secreted |
| P02462 | Collagen alpha-1                                       | 6  | 0.91 ± 0.10 | 1.05 ± 0.11 | 1.09 ± 0.01 | Secreted |
| P12107 | Collagen alpha-1                                       | 10 | 1.05 ± 0.03 | 1.11 ± 0.23 | 1.07 ± 0.01 | Secreted |
| P12109 | Collagen alpha-1                                       | 35 | 1.12 ± 0.06 | 1.03 ± 0.13 | 1.03 ± 0.21 | Secreted |
| P20908 | Collagen alpha-1                                       | 21 | 1.10 ± 0.17 | 1.07 ± 0.05 | 1.07 ± 0.08 | Secreted |
| P39059 | Collagen alpha-1                                       | 9  | 1.20 ± 0.09 | 0.99 ± 0.24 | 0.88 ± 0.29 | Secreted |
| Q99715 | Collagen alpha-1                                       | 32 | 0.97 ± 0.16 | 1.08 ± 0.00 | 0.99 ± 0.09 | Secreted |
| P05997 | Collagen alpha-2                                       | 32 | 1.08 ± 0.08 | 1.07 ± 0.13 | 0.99 ± 0.18 | Secreted |
| P08123 | Collagen alpha-2                                       | 95 | 1.05 ± 0.10 | 1.06 ± 0.02 | 1.05 ± 0.03 | Secreted |
| P08572 | Collagen alpha-2                                       | 16 | 0.87 ± 0.13 | 1.21 ± 0.05 | 1.19 ± 0.03 | Secreted |
| P12110 | Collagen alpha-2                                       | 16 | 1.10 ± 0.13 | 1.04 ± 0.07 | 0.95 ± 0.16 | Secreted |
| P12111 | Collagen alpha-3                                       | 23 | 0.63 ± 0.09 | 1.05 ± 0.44 | 1.18 ± 0.20 | Secreted |
| Q9BXJ0 | Complement C1q tumor necrosis factor-related protein 5 | 3  | 0.90 ± 0.04 | 0.98 ± 0.19 | 1.06 ± 0.14 | Secreted |
| P00736 | Complement C1r subcomponent                            | 12 | 1.11 ± 0.04 | 1.05 ± 0.09 | 1.05 ± 0.19 | Secreted |
| P09871 | Complement C1s subcomponent                            | 22 | 1.08 ± 0.03 | 1.04 ± 0.05 | 1.04 ± 0.07 | Secreted |
| P01024 | Complement C3                                          | 43 | 0.95 ± 0.10 | 1.06 ± 0.26 | 1.11 ± 0.24 | Secreted |
| P0C0L4 | Complement C4-A                                        | 24 | 1.29 ± 0.34 | 1.13 ± 0.28 | 1.04 ± 0.21 | Secreted |
| P00751 | Complement factor B                                    | 17 | 1.37 ± 0.06 | 1.03 ± 0.33 | 1.07 ± 0.34 | Secreted |
| P08603 | Complement factor H                                    | 20 | 0.98 ± 0.10 | 1.08 ± 0.08 | 1.02 ± 0.09 | Secreted |
| Q9UBG0 | C-type mannose receptor 2                              | 6  | 1.10 ± 0.17 | 1.05 ± 0.05 | 1.04 ± 0.04 | Membrane |
| P01034 | Cystatin-C                                             | 7  | 0.98 ± 0.04 | 1.01 ± 0.02 | 1.05 ± 0.03 | Secreted |
| Q15828 | Cystatin-M                                             | 3  | 1.00 ± 0.04 | 1.03 ± 0.16 | 1.00 ± 0.20 | Secreted |
| P01036 | Cystatin-S                                             | 3  | 1.24 ± 0.02 | 1.21 ± 0.07 | 1.04 ± 0.17 | Secreted |
| P01037 | Cystatin-SN                                            | 3  | 0.90 ± 0.00 | 1.03 ± 0.12 | 1.12 ± 0.09 | Secreted |
| P07585 | Decorin                                                | 12 | 1.03 ± 0.19 | 0.97 ± 0.10 | 0.97 ± 0.22 | Secreted |

|        |                                                                  |    |             |             |             |          |
|--------|------------------------------------------------------------------|----|-------------|-------------|-------------|----------|
| Q9UBP4 | Dickkopf-related protein 3                                       | 7  | 0.89 ± 0.04 | 1.09 ± 0.07 | 0.86 ± 0.07 | Secreted |
| P27487 | Dipeptidyl peptidase 4                                           | 27 | 1.08 ± 0.10 | 1.07 ± 0.09 | 0.99 ± 0.02 | Secreted |
| Q96PD2 | Discoidin, CUB and LCCL domain-containing protein 2              | 4  | 0.93 ± 0.07 | ND          | 1.16 ± 0.22 | Membrane |
| Q13443 | Disintegrin and metalloproteinase domain-containing protein 9    | 2  | 0.97 ± 0.07 | 1.01 ± 0.10 | 0.46 ± 0.11 | Membrane |
| Q13822 | Ectonucleotide pyrophosphatase/phosphodiesterase family member 2 | 37 | 1.00 ± 0.07 | 1.06 ± 0.08 | 1.00 ± 0.17 | Secreted |
| Q12805 | EGF-containing fibulin-like extracellular matrix protein 1       | 9  | 0.92 ± 0.04 | 1.02 ± 0.03 | 1.09 ± 0.04 | Secreted |
| O95967 | EGF-containing fibulin-like extracellular matrix protein 2       | 4  | 0.96 ± 0.16 | 1.04 ± 0.12 | 1.16 ± 0.44 | Secreted |
| O43854 | EGF-like repeat and discoidin I-like domain-containing protein 3 | 6  | 0.96 ± 0.17 | 1.09 ± 0.19 | 1.14 ± 0.03 | Secreted |
| Q9Y6C2 | EMILIN-1                                                         | 18 | 0.98 ± 0.05 | 1.04 ± 0.04 | 1.09 ± 0.01 | Secreted |
| Q9HCU0 | Endosialin                                                       | 2  | 0.94 ± 0.16 | 1.27 ± 0.00 | 1.20 ± 0.07 | Membrane |
| Q9NQ30 | Endothelial cell-specific molecule 1                             | 3  | 0.95 ± 0.10 | 1.12 ± 0.07 | 0.99 ± 0.31 | Secreted |
| P61916 | Epididymal secretory protein E1                                  | 4  | 1.03 ± 0.04 | ND          | 1.04 ± 0.01 | Secreted |
| Q16610 | Extracellular matrix protein 1                                   | 9  | 1.01 ± 0.22 | 1.10 ± 0.20 | 0.96 ± 0.13 | Secreted |
| P15311 | Ezrin                                                            | 30 | 1.03 ± 0.10 | 1.04 ± 0.02 | 1.05 ± 0.02 | Membrane |
| Q16658 | Fascin                                                           | 8  | 0.98 ± 0.12 | 0.97 ± 0.15 | 0.40 ± 0.04 | Membrane |
| P35555 | Fibrillin-1                                                      | 11 | 0.81 ± 0.03 | 0.93 ± 0.34 | 1.00 ± 0.16 | Secreted |
| Q06828 | Fibromodulin                                                     | 5  | 1.13 ± 0.15 | 0.32 ± 0.01 | 0.13 ± 0.00 | Secreted |
| P02751 | Fibronectin                                                      | 71 | 1.05 ± 0.07 | 1.09 ± 0.03 | 1.13 ± 0.01 | Secreted |
| P23142 | Fibulin-1                                                        | 19 | 1.31 ± 0.00 | 1.03 ± 0.42 | 0.88 ± 0.11 | Secreted |
| Q14315 | Filamin-C                                                        | 62 | 0.95 ± 0.09 | 1.00 ± 0.00 | 0.97 ± 0.12 | Membrane |
| P19883 | Follistatin                                                      | 3  | 0.84 ± 0.13 | 1.01 ± 0.12 | 1.05 ± 0.11 | Secreted |
| Q12841 | Follistatin-related protein 1                                    | 7  | 0.98 ± 0.02 | 1.07 ± 0.08 | 1.02 ± 0.08 | Secreted |
| P09382 | Galectin-1                                                       | 8  | 0.99 ± 0.03 | 0.94 ± 0.03 | 1.08 ± 0.05 | Secreted |
| Q08380 | Galectin-3-binding protein                                       | 23 | 0.98 ± 0.05 | 1.05 ± 0.08 | 0.99 ± 0.11 | Secreted |
| P09104 | Gamma-enolase                                                    | 8  | 1.14 ± 0.11 | 0.98 ± 0.07 | 0.88 ± 0.07 | Membrane |
| Q92820 | Gamma-glutamyl hydrolase                                         | 4  | 1.03 ± 0.00 | 1.15 ± 0.36 | 1.03 ± 0.06 | Secreted |
| P06396 | Gelsolin                                                         | 34 | 1.06 ± 0.07 | 1.02 ± 0.12 | 1.04 ± 0.22 | Secreted |
| P07093 | Glia-derived nexin                                               | 36 | 0.99 ± 0.10 | 0.93 ± 0.06 | 0.87 ± 0.20 | Secreted |
| P06744 | Glucose-6-phosphate isomerase                                    | 29 | 1.09 ± 0.05 | 1.06 ± 0.08 | 0.98 ± 0.03 | Secreted |
| P22352 | Glutathione peroxidase 3                                         | 5  | 1.33 ± 0.20 | 1.07 ± 0.38 | 0.98 ± 0.21 | Secreted |
| P06737 | Glycogen phosphorylase, liver form                               | 18 | 1.05 ± 0.23 | 0.98 ± 0.02 | 0.81 ± 0.18 | Membrane |
| P35052 | Glypican-1 [Cleaved into: Secreted glypican-1]                   | 8  | 1.13 ± 0.14 | 1.15 ± 0.15 | 1.08 ± 0.15 | Secreted |
| P28799 | Granulins                                                        | 3  | 0.83 ± 0.10 | 0.73 ± 0.00 | 1.17 ± 0.39 | Secreted |
| Q14393 | Growth arrest-specific protein 6                                 | 5  | 0.85 ± 0.10 | 1.02 ± 0.29 | 1.08 ± 0.22 | Secreted |
| Q9UBI6 | Guanine nucleotide-binding protein G                             | 2  | 0.94 ± 0.07 | 0.98 ± 0.04 | 0.75 ± 0.10 | Membrane |
| P10915 | Hyaluronan and proteoglycan link protein 1                       | 5  | 0.93 ± 0.06 | 1.09 ± 0.35 | 1.11 ± 0.29 | Secreted |

|          |                                                                        |    |             |             |             |          |
|----------|------------------------------------------------------------------------|----|-------------|-------------|-------------|----------|
| O14498   | Immunoglobulin superfamily containing leucine-rich repeat protein      | 6  | 0.95 ± 0.04 | 0.97 ± 0.00 | 0.97 ± 0.06 | Secreted |
| P18065   | Insulin-like growth factor-binding protein 2                           | 7  | 1.02 ± 0.04 | 1.21 ± 0.06 | 1.04 ± 0.04 | Secreted |
| P17936   | Insulin-like growth factor-binding protein 3                           | 10 | 0.61 ± 0.04 | 1.33 ± 0.33 | 1.16 ± 0.20 | Secreted |
| P22692   | Insulin-like growth factor-binding protein 4                           | 2  | 1.19 ± 0.00 | ND          | 1.07 ± 0.19 | Secreted |
| P24593   | Insulin-like growth factor-binding protein 5                           | 13 | 1.15 ± 0.07 | 1.12 ± 0.22 | 1.04 ± 0.20 | Secreted |
| P24592   | Insulin-like growth factor-binding protein 6                           | 3  | 1.13 ± 0.01 | 1.07 ± 0.07 | 1.05 ± 0.03 | Secreted |
| Q16270   | Insulin-like growth factor-binding protein 7                           | 19 | 1.02 ± 0.04 | 1.04 ± 0.06 | 1.03 ± 0.01 | Secreted |
| P26006   | Integrin alpha-3                                                       | 3  | 0.98 ± 0.01 | 1.08 ± 0.04 | 1.13 ± 0.14 | Membrane |
| P05556   | Integrin beta-1                                                        | 7  | 1.00 ± 0.06 | 1.07 ± 0.20 | 0.98 ± 0.10 | Membrane |
| P05231   | Interleukin-6                                                          | 5  | 0.78 ± 0.04 | 1.11 ± 0.48 | 1.05 ± 0.36 | Secreted |
| P03956   | Interstitial collagenase                                               | 8  | 0.66 ± 0.04 | 1.05 ± 0.52 | 0.99 ± 0.55 | Secreted |
| Q08431   | Lactadherin                                                            | 7  | 1.17 ± 0.10 | 1.11 ± 0.01 | 1.06 ± 0.15 | Membrane |
| P24043   | Laminin subunit alpha-2                                                | 5  | 0.73 ± 0.00 | 0.99 ± 0.24 | 1.36 ± 0.08 | Secreted |
| Q16363   | Laminin subunit alpha-4                                                | 37 | 0.95 ± 0.10 | 1.02 ± 0.07 | 1.05 ± 0.10 | Secreted |
| O15230   | Laminin subunit alpha-5                                                | 28 | 0.92 ± 0.09 | 1.08 ± 0.05 | 1.03 ± 0.09 | Secreted |
| P07942   | Laminin subunit beta-1                                                 | 44 | 0.99 ± 0.06 | 1.05 ± 0.00 | 1.04 ± 0.02 | Secreted |
| P55268   | Laminin subunit beta-2                                                 | 28 | 0.95 ± 0.10 | 1.00 ± 0.04 | 1.01 ± 0.07 | Secreted |
| P11047   | Laminin subunit gamma-1                                                | 40 | 0.97 ± 0.07 | 1.06 ± 0.03 | 1.04 ± 0.07 | Secreted |
| Q14767   | Latent-transforming growth factor beta-binding protein 2 - around 250K | 16 | 0.63 ± 0.08 | 1.39 ± 0.40 | 0.98 ± 0.01 | Secreted |
| Q14767 * | Latent-transforming growth factor beta-binding protein 2 - around 200K | 4  | ND          | ND          | 3.47 ± 0.64 | Secreted |
| P51884   | Lumican                                                                | 10 | 1.12 ± 0.11 | 1.05 ± 0.17 | 1.06 ± 0.22 | Secreted |
| P11279   | Lysosome-associated membrane glycoprotein 1                            | 2  | 0.97 ± 0.10 | 1.01 ± 0.08 | 1.01 ± 0.22 | Membrane |
| P13473   | Lysosome-associated membrane glycoprotein 2 - around 50 K              | 1  | 0.74 ± 0.00 | 1.06 ± 0.06 | ND          | Membrane |
| P13473 * | Lysosome-associated membrane glycoprotein 2 - around 37K               | 1  | ND          | 1.12 ± 0.17 | 1.28 ± 0.00 | Membrane |
| Q9Y4K0   | Lysyl oxidase homolog 2                                                | 9  | 0.72 ± 0.13 | 1.12 ± 0.46 | 1.07 ± 0.49 | Secreted |
| Q9UM22   | Mammalian ependymin-related protein 1                                  | 4  | 1.00 ± 0.11 | ND          | 1.00 ± 0.04 | Secreted |
| P08493   | Matrix Gla protein                                                     | 3  | 0.97 ± 0.02 | 1.39 ± 0.07 | 0.80 ± 0.05 | Secreted |
| P01033   | Metalloproteinase inhibitor 1                                          | 6  | 1.00 ± 0.02 | 0.98 ± 0.17 | 1.03 ± 0.09 | Secreted |
| P16035   | Metalloproteinase inhibitor 2                                          | 8  | 0.97 ± 0.02 | 1.02 ± 0.09 | 1.06 ± 0.01 | Secreted |
| P26038   | Moesin                                                                 | 55 | 1.01 ± 0.10 | 1.04 ± 0.03 | 1.03 ± 0.04 | Membrane |
| P29966   | Myristoylated alanine-rich C-kinase substrate                          | 7  | 1.03 ± 0.10 | 1.11 ± 0.09 | 1.12 ± 0.02 | Membrane |
| Q92859   | Neogenin                                                               | 5  | 0.75 ± 0.18 | ND          | 1.10 ± 0.31 | Membrane |
| P14543   | Nidogen-1                                                              | 15 | 1.13 ± 0.17 | 1.11 ± 0.26 | 1.02 ± 0.23 | Secreted |
| Q14112   | Nidogen-2                                                              | 7  | 1.10 ± 0.28 | 1.04 ± 0.04 | 1.10 ± 0.06 | Secreted |
| Q02818   | Nucleobindin-1                                                         | 26 | 1.00 ± 0.08 | 1.09 ± 0.03 | 0.99 ± 0.01 | Secreted |
| P80303   | Nucleobindin-2                                                         | 7  | 0.99 ± 0.23 | 0.91 ± 0.04 | 1.03 ± 0.17 | Secreted |

|        |                                                                      |    |             |              |              |          |
|--------|----------------------------------------------------------------------|----|-------------|--------------|--------------|----------|
| Q9NRN5 | Olfactomedin-like protein 3                                          | 4  | 0.89 ± 0.06 | 0.97 ± 0.09  | 0.93 ± 0.18  | Secreted |
| Q13219 | Pappalysin-1                                                         | 13 | 1.02 ± 0.09 | 1.01 ± 0.06  | 1.03 ± 0.02  | Secreted |
| P26022 | Pentraxin-related protein PTX3                                       | 17 | 0.91 ± 0.03 | 1.03 ± 0.08  | 1.05 ± 0.00  | Secreted |
| Q6UXB8 | Peptidase inhibitor 16                                               | 7  | 1.08 ± 0.06 | 1.05 ± 0.22  | 1.01 ± 0.10  | Secreted |
| Q92626 | Peroxidasin homolog                                                  | 20 | 0.86 ± 0.04 | 1.04 ± 0.15  | 1.09 ± 0.21  | Secreted |
| Q15124 | Phosphoglucomutase-like protein 5                                    | 10 | 0.82 ± 0.04 | 0.74 ± 0.15  | 1.29 ± 0.05  | Membrane |
| Q96FE7 | Phosphoinositide-3-kinase-interacting protein 1                      | 2  | 1.02 ± 0.23 | ND           | 0.96 ± 0.16  | Membrane |
| P55058 | Phospholipid transfer protein                                        | 5  | 0.99 ± 0.03 | 0.93 ± 0.00  | 1.10 ± 0.08  | Secreted |
| P36955 | Pigment epithelium-derived factor                                    | 10 | 1.17 ± 0.11 | 1.06 ± 0.14  | 1.02 ± 0.14  | Secreted |
| Q9BTY2 | Plasma alpha-L-fucosidase                                            | 3  | 0.96 ± 0.30 | 1.07 ± 0.12  | 0.72 ± 0.00  | Secreted |
| Q9Y646 | Plasma glutamate carboxypeptidase                                    | 4  | 0.99 ± 0.08 | 1.09 ± 0.00  | 0.82 ± 0.19  | Secreted |
| P05155 | Plasma protease C1 inhibitor                                         | 25 | 1.25 ± 0.10 | 1.02 ± 0.20  | 1.03 ± 0.23  | Secreted |
| P05121 | Plasminogen activator inhibitor 1                                    | 41 | 0.87 ± 0.05 | 1.04 ± 0.27  | 1.05 ± 0.21  | Secreted |
| Q6UX71 | Plexin domain-containing protein 2                                   | 5  | 0.90 ± 0.07 | 0.89 ± 0.32  | 1.07 ± 0.26  | Membrane |
| P15151 | Poliovirus receptor                                                  | 5  | 0.91 ± 0.07 | 1.07 ± 0.34  | 1.05 ± 0.03  | Secreted |
| Q10471 | Polypeptide N-acetylgalactosaminyltransferase 2                      | 13 | 0.95 ± 0.06 | 1.03 ± 0.09  | 1.09 ± 0.09  | Secreted |
| Q7Z7M9 | Polypeptide N-acetylgalactosaminyltransferase 5                      | 8  | 0.76 ± 0.13 | 1.05 ± 0.12  | 1.05 ± 0.16  | Membrane |
| Q07954 | Prolow-density lipoprotein receptor-related protein 1                | 35 | 0.95 ± 0.14 | 1.05 ± 0.01  | 0.96 ± 0.06  | Membrane |
| P41222 | Prostaglandin-H2 D-isomerase                                         | 7  | 0.95 ± 0.02 | 1.05 ± 0.18  | 1.01 ± 0.17  | Secreted |
| P55145 | Protein ARMET                                                        | 3  | 1.17 ± 0.03 | 1.23 ± 0.04  | 1.09 ± 0.07  | Secreted |
| P07237 | Protein disulfide-isomerase                                          | 40 | 1.11 ± 0.05 | 1.02 ± 0.07  | 1.02 ± 0.08  | Secreted |
| Q92520 | Protein FAM3C                                                        | 6  | 1.11 ± 0.11 | 1.04 ± 0.17  | 1.06 ± 0.03  | Secreted |
| P28300 | Protein-lysine 6-oxidase                                             | 2  | 0.63 ± 0.10 | 0.96 ± 0.00  | 1.12 ± 0.01  | Secreted |
| Q92954 | Proteoglycan 4                                                       | 12 | 0.94 ± 0.04 | 1.20 ± 0.06  | 1.09 ± 0.23  | Secreted |
| P50395 | Rab GDP dissociation inhibitor beta                                  | 17 | 1.04 ± 0.15 | 1.03 ± 0.10  | 0.99 ± 0.08  | Membrane |
| P35241 | Radixin                                                              | 21 | 1.20 ± 0.43 | ND           | 1.09 ± 0.07  | Membrane |
| P62491 | Ras-related protein Rab-11A                                          | 2  | 0.98 ± 0.04 | 1.09 ± 0.00  | 1.04 ± 0.06  | Membrane |
| A1L4H1 | Scavenger receptor cysteine-rich domain-containing protein LOC284297 | 5  | 0.73 ± 0.10 | 1.17 ± 0.00  | 1.40 ± 0.14  | Secreted |
| P13521 | Secretogranin-2                                                      | 9  | 0.57 ± 0.09 | 1.17 ± 0.48  | 0.73 ± 0.13  | Secreted |
| Q13228 | Selenium-binding protein 1                                           | 3  | 1.18 ± 0.00 | 0.00 ± 0.00  | 0.87 ± 0.05  | Membrane |
| O75326 | Semaphorin-7A                                                        | 8  | 0.91 ± 0.05 | 1.04 ± 0.22  | 1.08 ± 0.27  | Membrane |
| Q12884 | Seprase                                                              | 6  | 0.86 ± 0.19 | 1.07 ± 0.13  | 0.93 ± 0.16  | Membrane |
| P10124 | Serglycin                                                            | 6  | 0.98 ± 0.05 | 0.94 ± 0.01  | 0.98 ± 0.03  | Secreted |
| Q92743 | Serine protease HTRA1                                                | 18 | 0.95 ± 0.00 | 14.52 ± 0.13 | 23.24 ± 1.98 | Secreted |
| O75094 | Slit homolog 3 protein                                               | 2  | 0.84 ± 0.11 | ND           | 1.21 ± 0.16  | Secreted |
| P09486 | SPARC                                                                | 16 | 0.96 ± 0.03 | 1.05 ± 0.11  | 1.04 ± 0.13  | Secreted |

|        |                                                            |    |             |             |             |          |
|--------|------------------------------------------------------------|----|-------------|-------------|-------------|----------|
| Q01082 | Spectrin beta chain, brain 1                               | 26 | 0.90 ± 0.09 | 1.03 ± 0.14 | 1.14 ± 0.23 | Membrane |
| P52823 | Stanniocalcin-1                                            | 3  | 0.80 ± 0.03 | 1.35 ± 0.00 | 1.15 ± 0.24 | Secreted |
| O76061 | Stanniocalcin-2                                            | 6  | 0.93 ± 0.05 | 1.06 ± 0.08 | 1.13 ± 0.02 | Secreted |
| O00391 | Sulfhydryl oxidase 1                                       | 29 | 0.88 ± 0.05 | 1.01 ± 0.11 | 1.05 ± 0.04 | Secreted |
| Q99536 | Synaptic vesicle membrane protein VAT-1 homolog            | 4  | 1.02 ± 0.50 | 0.89 ± 0.06 | 0.83 ± 0.31 | Membrane |
| P31431 | Syndecan-4                                                 | 5  | 1.14 ± 0.09 | 1.07 ± 0.11 | 0.93 ± 0.08 | Membrane |
| Q9Y490 | Talin-1                                                    | 15 | 0.95 ± 0.13 | 0.74 ± 0.14 | 0.21 ± 0.04 | Membrane |
| Q08629 | Testican-1                                                 | 7  | 0.72 ± 0.16 | 1.15 ± 0.48 | 0.91 ± 0.14 | Secreted |
| P07996 | Thrombospondin-1                                           | 35 | 0.77 ± 0.06 | 1.07 ± 0.34 | 0.98 ± 0.19 | Secreted |
| P35442 | Thrombospondin-2                                           | 15 | 0.85 ± 0.08 | 1.04 ± 0.16 | 0.96 ± 0.07 | Secreted |
| P49746 | Thrombospondin-3                                           | 13 | 0.86 ± 0.07 | 1.05 ± 0.19 | 0.93 ± 0.14 | Secreted |
| P00750 | Tissue-type plasminogen activator                          | 2  | 0.77 ± 0.00 | 1.01 ± 0.14 | 1.06 ± 0.02 | Secreted |
| P61812 | Transforming growth factor beta-2                          | 5  | 0.87 ± 0.00 | 1.12 ± 0.18 | 1.02 ± 0.15 | Secreted |
| Q15582 | Transforming growth factor-beta-induced protein ig-h3      | 24 | 0.79 ± 0.06 | 1.38 ± 0.26 | 1.15 ± 0.03 | Secreted |
| P37802 | Transgelin-2                                               | 8  | 0.87 ± 0.04 | 1.02 ± 0.14 | 0.72 ± 0.00 | Membrane |
| O00300 | Tumor necrosis factor receptor superfamily member 11B      | 3  | 1.12 ± 0.14 | 0.93 ± 0.05 | 1.03 ± 0.12 | Secreted |
| P30530 | Tyrosine-protein kinase receptor UFO                       | 3  | 0.99 ± 0.15 | 0.72 ± 0.19 | 0.91 ± 0.04 | Membrane |
| P78324 | Tyrosine-protein phosphatase non-receptor type substrate 1 | 4  | 0.97 ± 0.05 | 1.15 ± 0.15 | 1.30 ± 0.13 | Membrane |
| Q969H8 | UPF0556 protein C19orf10                                   | 7  | 1.04 ± 0.09 | 1.01 ± 0.17 | 1.04 ± 0.04 | Secreted |
| P19320 | Vascular cell adhesion protein 1                           | 9  | 1.24 ± 0.35 | 1.01 ± 0.18 | 0.95 ± 0.16 | Membrane |
| Q6EMK4 | Vasorin                                                    | 9  | 1.03 ± 0.08 | 1.04 ± 0.04 | 1.06 ± 0.05 | Secreted |
| P13611 | Versican core protein                                      | 27 | 0.88 ± 0.06 | 1.11 ± 0.15 | 1.03 ± 0.21 | Secreted |
| P07225 | Vitamin K-dependent protein S                              | 7  | 0.77 ± 0.03 | 1.02 ± 0.26 | 1.06 ± 0.20 | Secreted |
| P04004 | Vitronectin                                                | 4  | 1.06 ± 0.42 | 1.07 ± 0.10 | 0.46 ± 0.05 | Secreted |

\* Proteins detected as cleavage fragments

The error associated with two experiments (e.g., forward and reverse experiment)

ND: not determine
